# Supplementary material for: Sherry Wines: Worldwide Production, Chemical Composition and Screening Conception for Flor Yeasts
Source: MDPI journal article supplement (doi:10.3390/fermentation8080381), 2022-08-10
Supplement: s1 [file s1]

## Supplementary Material

**Table S1.** Genetic, oenological, and growth rate characteristics of *S. cerevisiae* strains.

| Strain ID               | Genotype markers* |       |            | Oenological characteristics |                     |                 |                 |                |                                                   | Growth rate           |                               |
|-------------------------|-------------------|-------|------------|-----------------------------|---------------------|-----------------|-----------------|----------------|---------------------------------------------------|-----------------------|-------------------------------|
|                         | ITS 1-4           | FLO11 | YDR 379C-A | Concentration               |                     |                 |                 | Flor growth ** | Presence of "Sherry" Tones in Aroma and Taste *** | Lag phase duration, h | Exp. growth phase duration, h |
|                         |                   |       |            | Sugars, g/l                 | Volatile acids, g/l | Aldehydes, mg/l | Alcohol, % vol. |                |                                                   |                       |                               |
| Flor collection strains |                   |       |            |                             |                     |                 |                 |                |                                                   |                       |                               |
| 229                     | F                 | F     | F          | 2.5±0.06                    | 0.66±0.01           | 286.0±5.9       | 11.3±0.1        | +++            | +                                                 | 7                     | 19                            |
| 285                     | F                 | F     | ND         | 1.3±0.06                    | 0.48±0.03           | 211.0±9.4       | 11.3±0.1        | +++            | +                                                 | 15                    | 20                            |
| 329                     | F                 | F     | F          | 1.2±0.06                    | 0.52±0.02           | 179.6±2.6       | 11.4±0.1        | +++            | +                                                 | 5                     | 30                            |
| 566                     | W                 | F     | F          | 0.8±0.15                    | 0.60±0.02           | 352.0±8.4       | 11.1±0.1        | +++            | +                                                 | 9                     | 13                            |
| Wine collection strains |                   |       |            |                             |                     |                 |                 |                |                                                   |                       |                               |
| 271                     | W                 | F     | F          | 3.7±0.15                    | 0.10±0.01           | 343.2±20.8      | 9.5±0.1         | +++            | +                                                 | 5                     | 24                            |
| 328                     | W                 | F     | ND         | 4.2±0.10                    | 0.46±0.01           | 132.0±6.8       | 11.4±0.1        | +++            | +                                                 | 4                     | 16                            |
| 525                     | W                 | F     | F          | 2.7±0.06                    | 0.59±0.05           | 149.6±9.1       | 11.7±0.1        | +              | +                                                 | 5                     | 21                            |
| Environmental strains   |                   |       |            |                             |                     |                 |                 |                |                                                   |                       |                               |
| 3                       | F/W               | F     | F          | 1.9±0.12                    | 0.78±0.04           | 65.9±4.0        | 12.3±0.1        | +++            | +                                                 | 7                     | 13                            |
| 23                      | F                 | F     | F          | 2.3±0.15                    | 0.46±0.03           | 105.6±6.4       | 11.9±0.1        | +++            | +                                                 | 6                     | 18                            |
| 28                      | W                 | F     | W          | 0.9±0.06                    | 0.35±0.02           | 73.0±4.4        | 12.8±0.1        | -              | -                                                 | 5                     | 15                            |
| 45                      | W                 | W     | F          | 1.9±0.06                    | 0.64±0.02           | 84.5±5.1        | 12.2±0.1        | -              | -                                                 | 5                     | 15                            |

Table S1. *Cont.*

| Strain ID             | Genotype markers* |       |            | Oenological characteristics |                     |                 |                 |                |                                                   | Growth rate           |                               |
|-----------------------|-------------------|-------|------------|-----------------------------|---------------------|-----------------|-----------------|----------------|---------------------------------------------------|-----------------------|-------------------------------|
|                       | ITS 1-4           | FLO11 | YDR 379C-A | Concentration               |                     |                 |                 | Flor growth ** | Presence of "Sherry" Tones in Aroma and Taste *** | Lag phase duration, h | Exp. growth phase duration, h |
|                       |                   |       |            | Sugars, g/l                 | Volatile acids, g/l | Aldehydes, mg/l | Alcohol, % vol. |                |                                                   |                       |                               |
|                       |                   |       |            |                             |                     |                 |                 |                |                                                   |                       |                               |
| Environmental strains |                   |       |            |                             |                     |                 |                 |                |                                                   |                       |                               |
| 53                    | F/W               | W     | W          | 1.1±0.10                    | 0.21±0.01           | 34.3±2.1        | 12.9±0.1        | +              | -                                                 | 4                     | 14                            |
| 54                    | F/W               | W     | F          | 0.1±0.06                    | 0.59±0.02           | 148.7±9.0       | 12.7±0.1        | +++            | +                                                 | 9                     | 15                            |
| 78                    | W                 | W     | F          | 0.6±0.06                    | 0.75±0.03           | 154.9±9.4       | 12.6±0.1        | +              | +                                                 | 6                     | 18                            |
| 79                    | W                 | W     | F          | 0.2±0.10                    | 0.66±0.02           | 91.5±5.5        | 12.3±0.1        | -              | -                                                 | 5                     | 20                            |
| 90                    | F                 | W     | W          | 1.3±0.06                    | 0.30±0.02           | 74.5±4.5        | 12.7±0.1        | -              | -                                                 | 7                     | 13                            |
| 98                    | W                 | W     | W          | 1.3±0.06                    | 1.10±0.10           | 183.9±6.6       | 13.0±0.1        | -              | -                                                 | 2                     | 15                            |
| 109                   | F/W               | F     | F          | 0.3±0.06                    | 0.72±0.03           | 283.4±17.2      | 12.7±0.1        | +++            | +                                                 | 8                     | 16                            |
| 110                   | F                 | W     | F          | 0.7±0.06                    | 0.90±0.04           | 253.4±15.4      | 12.5±0.1        | +              | +                                                 | 3                     | 18                            |
| 111                   | F/W               | F     | F          | 0.6±0.12                    | 0.66±0.02           | 279.8±17.0      | 11.9±0.1        | +++            | +                                                 | ND                    | ND                            |
| 112                   | W                 | W     | F          | 1.6±0.06                    | 0.54±0.03           | 176.0±10.7      | 12.3±0.1        | -              | -                                                 | 4                     | 17                            |
| 113                   | F/W               | F     | F          | 1.2±0.10                    | 0.87±0.03           | 176.0±10.7      | 12.6±0.1        | +++            | +                                                 | 4                     | 20                            |

All data are measured three times and given in mean values with standard deviation; \*The distribution of alleles characteristics: W – wine; F – flor; F/W – heterozygote; 329 flor – strain – control collection industrial strain; ND – no data. \*\*Expert opinion based on the results of the tasting. \*\*\*Flor grown on the surface of fermented must: (-) no growth, (+) formation of few islands, (+++) flor covering the entire surface of the flask. Adapted from [1].

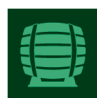Table S2. Stress resistance, and adhesive characteristics of *S. cerevisiae* strains.

| Strain ID               | Stress resistance, % |                 |                      | Hydrophobisity, %<br>(Isooctane test) | Adh. to polystyrene,<br>OD <sub>600</sub> |
|-------------------------|----------------------|-----------------|----------------------|---------------------------------------|-------------------------------------------|
|                         | to Ethanole          | to Acetaldehyde | to Hydrogen peroxide |                                       |                                           |
| Flor collection strains |                      |                 |                      |                                       |                                           |
| 229                     | 60.0±16              | 12.1±10.0       | 53.8±9.2             | 61.5±26.6                             | 1.15±0.26                                 |
| 285                     | 70.0±16              | 26.7±15.0       | 78.6±15.4            | 54.0±26.6                             | 1.75±0.50                                 |
| 329                     | 45.0±12              | 21.7±15.0       | 68.0±9.2             | 76.0±30.0                             | 2.05±0.50                                 |
| 566                     | 88.6±16              | 35.4±10.0       | 59.1±9.2             | 45.5±23.3                             | 1.18±0.26                                 |
| Wine collection strains |                      |                 |                      |                                       |                                           |
| 271                     | 53.3±16              | 13.8±10.0       | 77.3±12.3            | 79.0±26.6                             | 1.70±0.50                                 |
| 328                     | 92.0±12              | 32.8±10.0       | 55.2±15.4            | 27.5±26.6                             | 0.78±0.20                                 |
| 525                     | 127.6±32             | 34.3±15.0       | 48.1±15.4            | 50.0±26.6                             | 0.87±0.20                                 |
| Environmental strains   |                      |                 |                      |                                       |                                           |
| 3                       | 65.6±10              | 37.9±13.8       | 68.0±13.8            | 89.0±30.0                             | 1.48±0.30                                 |
| 23                      | 100.0±16             | 41.7±10.0       | 53.4±10.7            | 80.5±23.3                             | 1.20±0.26                                 |
| 28                      | 70.6±16              | 52.9±11.8       | 44.2±12.3            | 66.5±23.3                             | 1.34±0.33                                 |
| 45                      | 68.9±16              | 68.8±15.0       | 75.0±10.7            | 25.5±30.0                             | 0.80±0.20                                 |
| 53                      | 69.4±14              | 69.1±10.0       | 19.1±9.2             | 27.0±26.6                             | 1.17±0.26                                 |
| 54                      | 98.5±12              | 35.4±15.0       | 89.4±15.4            | 67.0±23.3                             | 1.47±0.30                                 |
| 78                      | 90.7±16              | 40.6±15.0       | 25.6±12.3            | 80.5±23.3                             | 0.81±0.20                                 |
| 79                      | 73.5±12              | 43.5±15.0       | 47.6±9.2             | 63.0±30.0                             | 0.59±0.13                                 |
| 90                      | 92.6±16              | 37.3±15.0       | 74.3±13.8            | 17.5±30.0                             | 1.56±0.36                                 |
| 98                      | 53.2±12              | 62.6±15.0       | 50.6±10.7            | 31.5±30.0                             | 0.60±0.13                                 |
| 109                     | 97.5±10              | 80.4±12.5       | 58.3±12.3            | 67.0±26.6                             | 1.61±0.36                                 |
| 110                     | 77.5±12              | 60.8±11.8       | 70.1±9.2             | 0.0                                   | 0.82±0.20                                 |
| 111                     | 79.4±16              | 61.2±17.5       | 31.3±12.3            | 58.0±26.6                             | 2.12±0.50                                 |
| 112                     | 95.2±10              | 30.8±12.5       | 62.5±9.2             | 0.0                                   | 1.03±0.23                                 |
| 113                     | 49.6±16              | 43.8±17.5       | 39.5±12.3            | 49.5±23.3                             | 1.52±0.30                                 |

All data are measured three times and given in mean values with standard deviation; 329 flor strain – control collection industrial strain; ND – no data. Adapted from [1].

**Table S3.** Average iron concentration in *S. cerevisiae* cells with "sherry" and "wine" variants of the AFT1 and FRE-FIT loci during cultivation on media with different iron concentration.

| Fe <sup>2+</sup> Conc. in Medium,<br>mM | Fe <sup>2+</sup> Conc. in "sherry" yeast<br>cells, µg/g | Fe <sup>2+</sup> Conc. in "wine" yeast<br>cells, µg/g |
|-----------------------------------------|---------------------------------------------------------|-------------------------------------------------------|
| 0,1                                     | 570                                                     | 270                                                   |
| 3                                       | 2,2 x 10 <sup>3</sup>                                   | 3,6 x 10 <sup>3</sup>                                 |

Adapted from [2].

## References

1. Eldarov, M.A.; Avdanina, D.A.; Ivanova, E.; Shalamitskiy, M.Y.; Tanashchuk, T.N.; Vybornaya, T.; Ravin, N. V.; Kishkovskaya, S.A.; Mardanov, A. V. Stress resistance and adhesive properties of commercial flor and wine strains, and environmental isolates of *saccharomyces cerevisiae*. *Fermentation* **2021**, *7*, doi:10.3390/FERMENTATION7030188.
2. El'darov, M.A.; Avdanina, D.A.; Shalamitskii, M.Y.; Ivanova, E. V.; Tanashchuk, T.N.; Kishkovskaya, S.A.; Ravin, N. V.; Mardanov, A. V. Polymorphism of the Iron Homeostasis Genes and Iron Sensitivity in *Saccharomyces cerevisiae* Flor and Wine Strains. *Microbiol. (Russian Fed.* **2019**, *88*, 200–205, doi:10.1134/S0026261719020036.
